# Supplementary material for: Machine learning plus optical flow: a simple and sensitive method to detect cardioactive drugs
Source: Sci Rep. 2015 Jul 3;5:11817. doi: 10.1038/srep11817 (PMC4490343; doi:10.1038/srep11817)
Supplement: Supplementary Information [file srep11817-s1.pdf]

# **Machine Learning plus Optical flow: A simple and sensitive method to detect cardioactive drugs**

**Eugene K. Lee<sup>1,#</sup>, Yosuke K. Kurokawa<sup>2,#</sup>, Robin Tu<sup>3</sup>, Steven C. George<sup>2,4,§</sup>, and Michelle Khine<sup>1,5,§,\*</sup>**

**Department of Biomedical Engineering<sup>1</sup>, University of California, Irvine, Irvine, CA 92697.**

**Department of Biomedical Engineering<sup>2</sup>, Washington University in St. Louis, St. Louis, MO 63130.**

**Department of Statistics<sup>3</sup>, California Polytechnic State University, San Luis Obispo, San Luis Obispo, CA 93410.**

**Department of Energy, Environment, and Chemical Engineering<sup>4</sup>, Washington University in St. Louis, St. Louis, MO 63130.**

**Department of Chemical Engineering and Material Science<sup>5</sup>, University of California, Irvine, Irvine, CA 92697.**

**<sup>#,§</sup> Authors contributed equally to this work**

**\* Corresponding Author**

**Correspondence to: Michelle Khine (mkhine@uci.edu)**

Supplementary Information

Supplementary Methods

Generation of Contractile Profile

After the image is processed with the optical flow algorithm, a matrix containing the magnitude of the x- and y-vectors throughout the acquisition period will be generated. A mask is then created to identify and segment out the region of interest. This task is done by performing a PCA analysis with an eigendecomposition for spatial resolution. The norms of the eigenvalues of the 1<sup>st</sup> PCA are then sorted in order of highest to lowest. The lowest number in the first quartile is then regarded as the mask threshold. Using this mask threshold, a spatial mask is generated to describe regions that have generated the most motion throughout the acquisition. With the regions of interest identified, a PCA is done on the selected area for temporal resolution. When the norm of these eigenvalues are plotted out, the contractile profile is generated.

Supplementary Figures

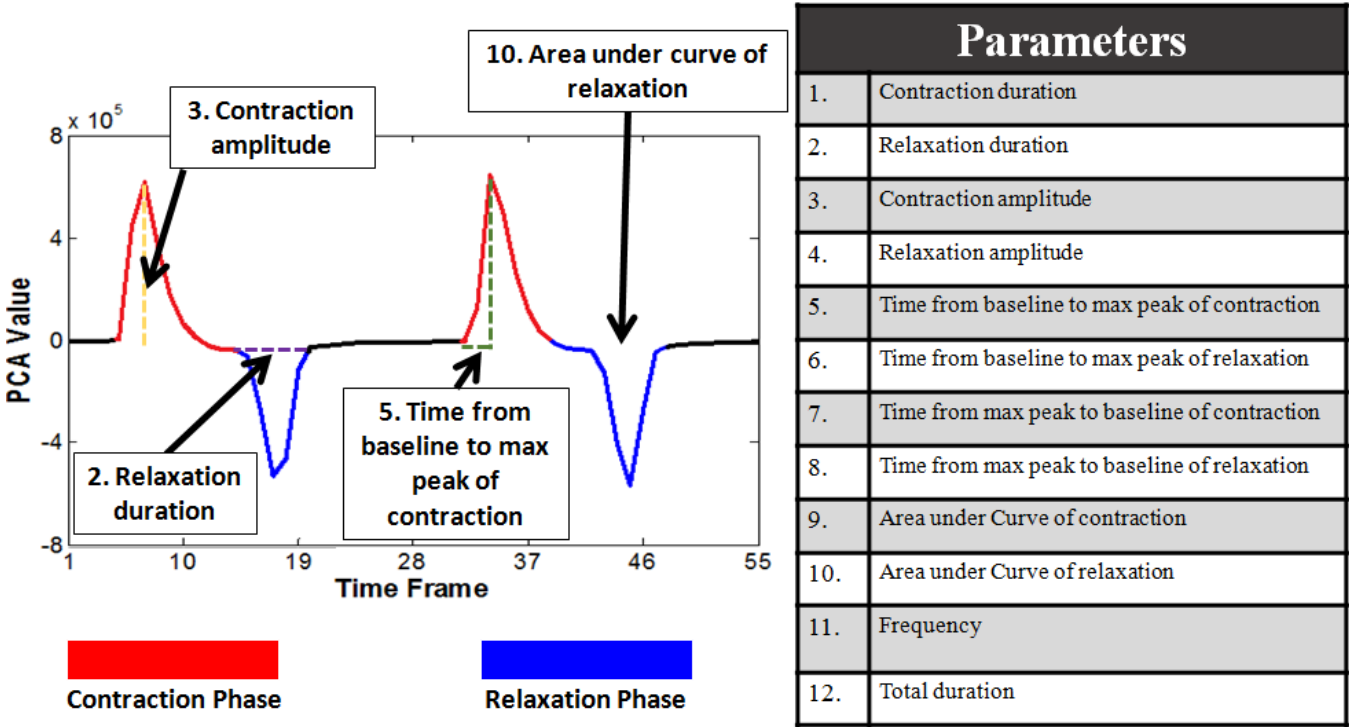

**Supplementary Figure 1:** Parameters derived from the contractile profiles based on the 1<sup>st</sup> PCA of motion vectors. (Left panel) Red indicates the contraction phase of an iPS-CM beat and has positive PCA values. The blue indicates the subsequent relaxation phase of a beat and is designated by negative PCA values. (Right panel) List of the 12 parameters that are extracted from the contractile profile.

# Set 1

# Set 2

# Set 3

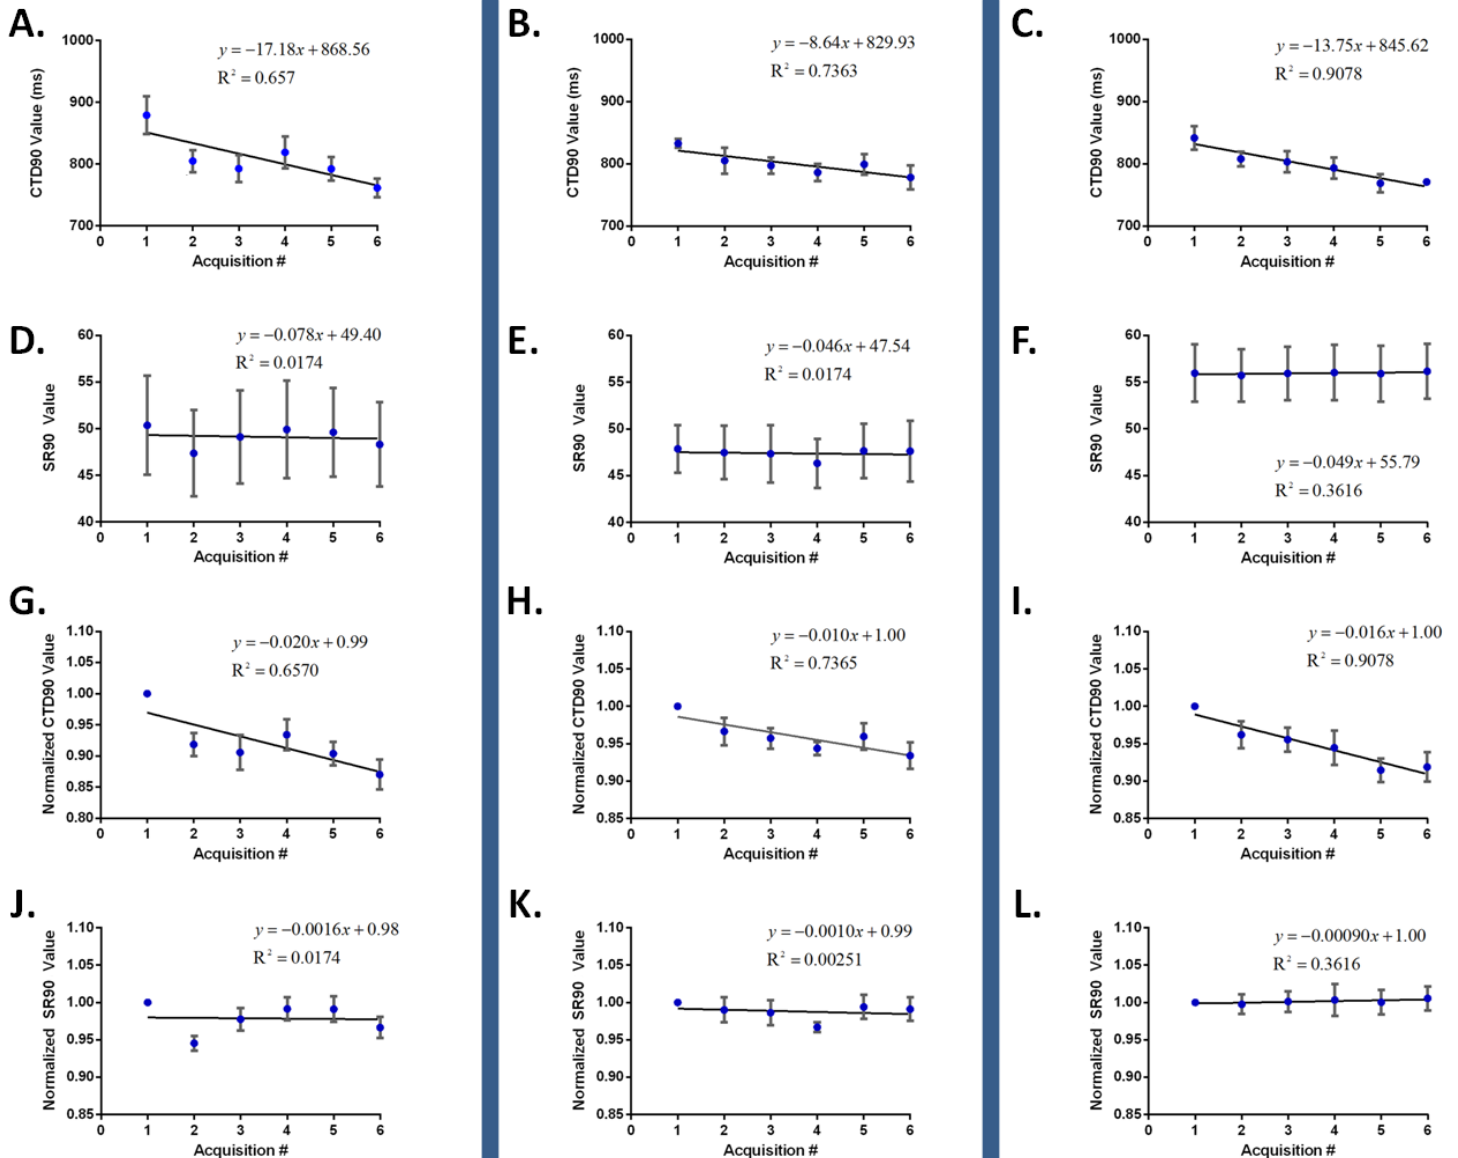

**Supplementary Figure 2:** (A-C) Set 1 & 2 of the longitudinal experiments had acquisitions taken at intervals of 30 minutes; while Set 3 had acquisitions taken at intervals of 9 minutes with exception of last time point (time point was taken at 90 minutes instead). The results showed a similar decrease in CTD<sub>90</sub>, suggesting that there is little to no recovery from photobleaching during the length of the experiment. While the decrease is similar, the CTD<sub>90</sub> values among each of the sets of microscope chamber slides used for the longitudinal experiment decreased at different rates. (D-E) The calculated SR<sub>90</sub> for all three sets removed the decaying trend among acquisitions. (F-G) To control for the different initial CTD<sub>90</sub> values, all subsequent values were normalized to the starting values. The normalization still yielded decreasing trends that differed among the sets. (J-L) The best-fit lines generated from the linear regression of the normalized SR<sub>90</sub> values were relatively uniform.

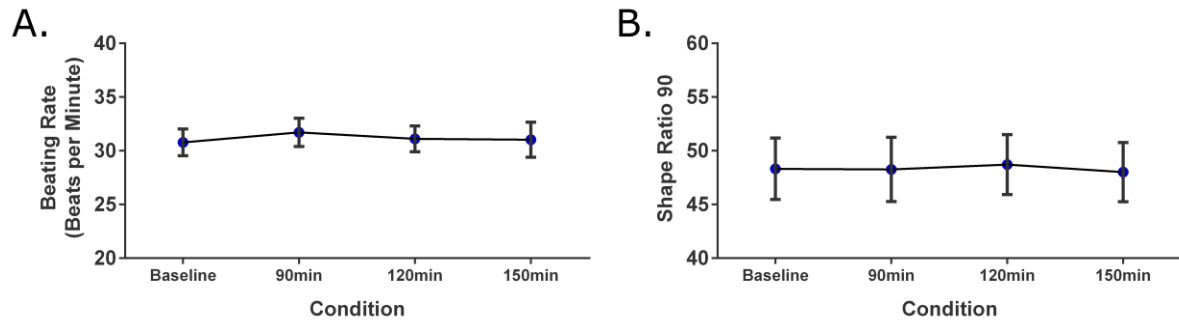

**Supplemental Figure 3:** Analysis of GCaMP6 data from longitudinal study. With the GCaMP6 method, no significant changes in the (A) beating rate or (B)  $SR_{90}$  were detected at any of the time points ( $n = 13$ ).

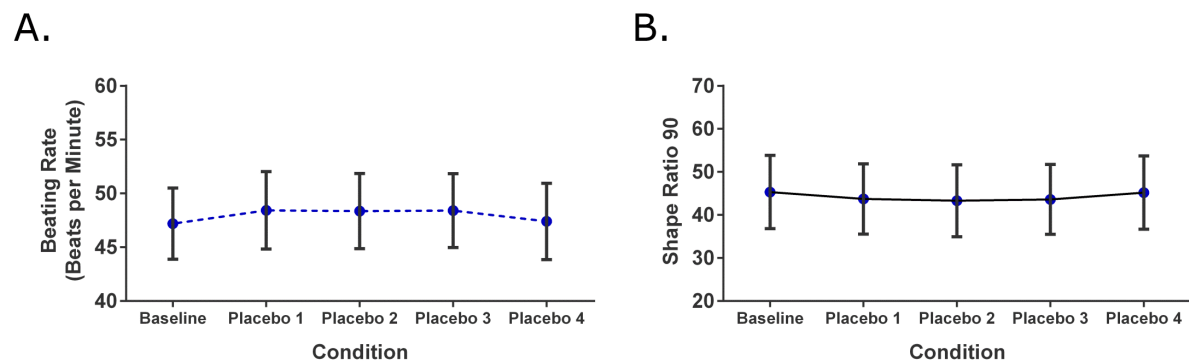

**Supplemental Figure 4:** Analysis of GCaMP6 data from placebo study. During the length of the placebo experiments, there was no observable change in the (A) beating rate or (B)  $SR_{90}$  using the GCaMP analysis ( $n = 18$ ).
